# Supplementary material
Source: Research Square preprint supplement (doi:10.21203/rs.3.rs-8821442/v1)
Supplement: Supplementary file 1 [file 22b1e71c077bfa8bc31403f7.docx]

Topic：Visualizing Interaction Design Trends in Museums:

A 30-Year Bibliometric Study

# 1. Data Sources and Datasets

Web Of Science Core Collection

Scopus (Elsevier)

PubMed

- The original and cleaned datasets used in the analysis, including citation records and full metadata, have been uploaded as supplementary files. These files are provided in raw (.txt) formats to facilitate transparency and reproducibility.

# **2. Search Strategies, Query Strings, and Deduplication Log**

- The search strategy was designed to capture literature related to museum displays, interaction design, and user experience. Boolean operators and field tags were adapted for three databases to ensure consistency and coverage, need note that the words within the quotation marks are searched for exactly. Full search strings for each database are provided in next index word:
- **Index word:**
- TS=("Museum display" OR "museum exhibit" OR "Museums display" OR "museum exhibitions" OR "museum exhibiting" OR "museum showing" OR "Museum show" OR "Presentation in museums") AND ("Interaction design" OR "interactive design" OR "Interaction" OR "interface design" OR "Interact design" OR "Interactive" OR "interactive designing" OR "computer interactive design"OR "interactive analysis "OR "interaction designing"OR "system interactive design"OR "human-computer interaction design"OR "interaction interface"OR "intelligent design"OR "web interface design "OR "interactive interface design"OR "interface interaction design") AND ("user experience" OR "user's experience" OR "user experience design" OR "customer's experience" OR "user experience design" OR "customer's experience" OR "experience of users" OR "UX" OR "user experiences" OR "interaction user-experience" OR "the users' experience" OR "players' experience" OR "user research").

****Deduplication Process:****

Following the initial retrieval, all records were imported into EndNote for literature management. A systematic deduplication process was conducted based on title, author(s), publication year, volume, issue, and page numbers. Automated duplicate detection was complemented by manual verification to ensure accuracy.

# 3. Inclusion and Exclusion Criteria

The screening process followed a structured protocol to ensure the relevance and quality of the included studies.

**Inclusion Criteria:**

Search date: May 30, 2025;

Time range:Published between January 1995 and May 2025;

Language:Written in English;

Literature type:article and review article;

a total of 669 articles were retrieved, Manually eliminate the irrelevant literature, leaving 656 articles remaining. The complete database after duplicates have been removed is listed in the supplementary document "Appendix B - De-duplicated Data".

Focused on museum exhibitions, interaction design, and user experience

**Exclusion Criteria:**

Proceeding Paper，Book Chapters，Early Access，Editorial Material，Data Paper，Meeting Abstract，Retracted Publication, Duplicate records across databases

1. **Coding Scheme, Variable Definitions, and Data Transformations**

The data used in this article does not comply with the coding and variable definitions. The following transformations were applied to prepare the data for specific analytical techniques in CiteSpace:

| ***Analysis type*** | ***Data transformation applied*** |
| --- | --- |
| author co-occurrence analysis | Author names parsed into last name + initials format; fractional counting applied for multi-authored papers |
| Journal Co-Citation Analysis | Reference strings parsed into standardized format (author, year,journal, volume, page) |
| Keyword clustering and keywordtimeline analysis | Keywords converted to lowercase; punctuation removed; term grouping based on semantic similarity |
| Literature Co-Citation and Burst Analysis | Citation data normalized by year to identify sudden increases in citation activity |
| timeline analysis | Publication years extracted and used as temporal markers for node placement |
